# Supplementary material
Source: Springer Nature journal article supplement (https://www.springermedizin.de/resource/supplementary/12883_2009_314_MOESM1_ESM.pdf/9455134)

Sc 17  
T1FE/M  
SI2

H

P

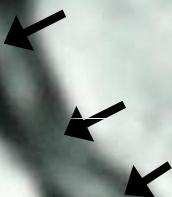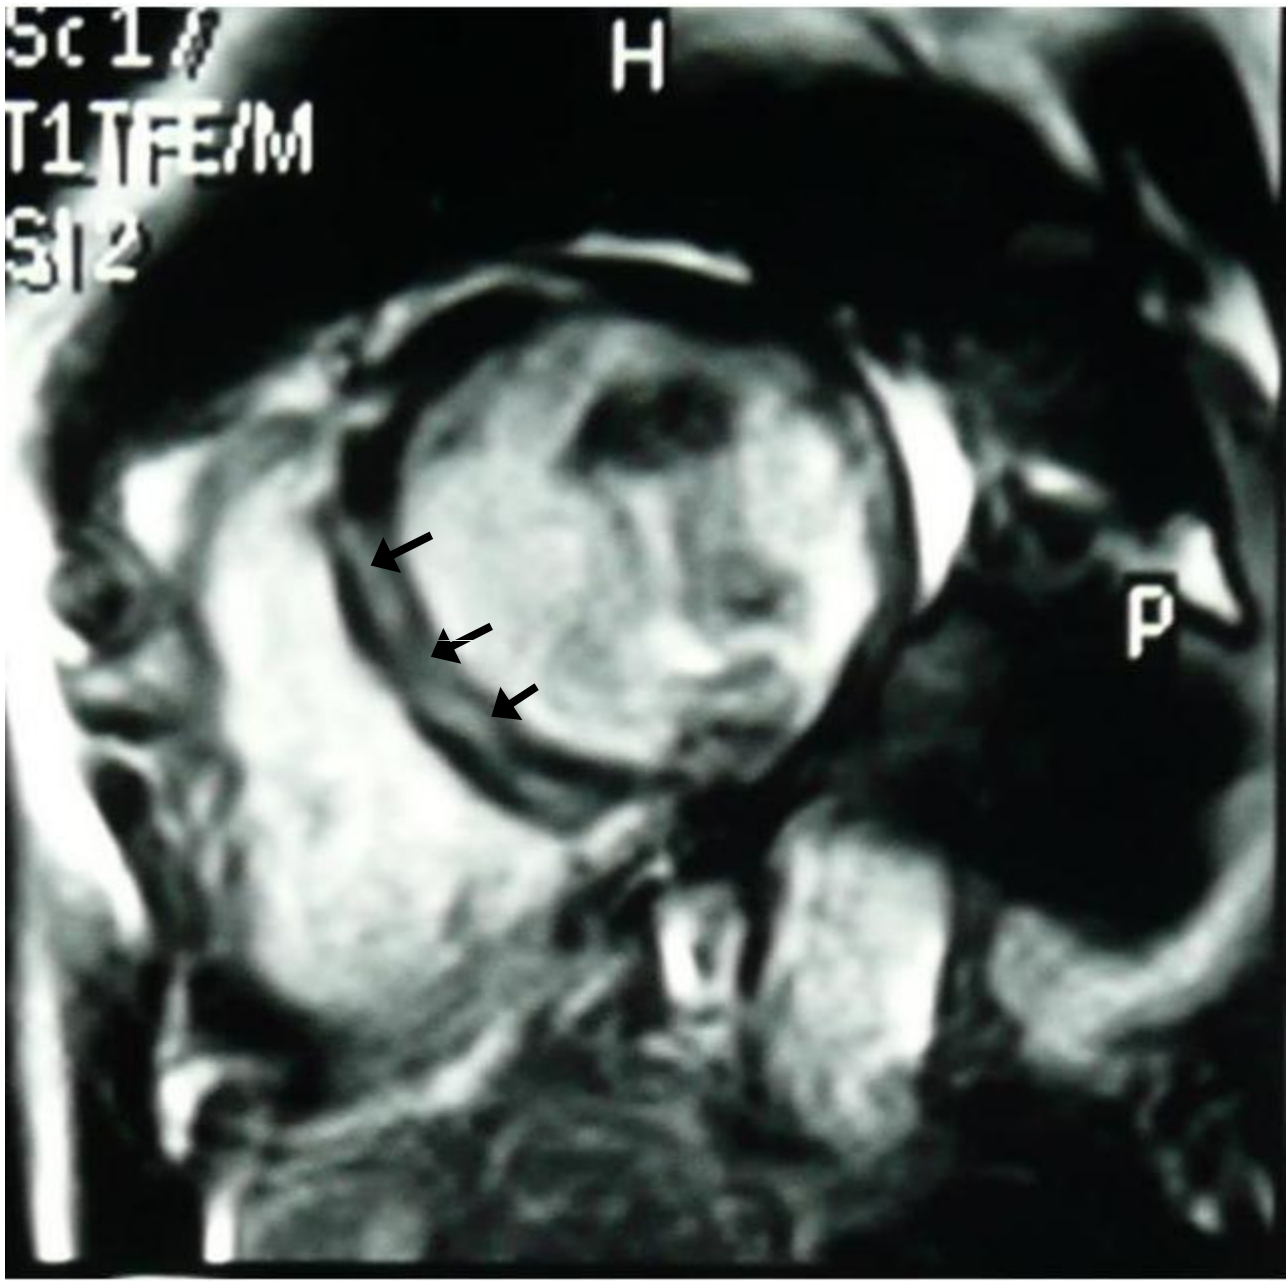

Supplement: MOESM1 [file 9455134]
